# Supplementary material for: A label-free electrochemical aptasensor for the detection of kanamycin in milk
Source: Royal Society of Chemistry journal article supplement (doi:10.1039/c4ay02710h), 2015-01-01
Supplement: c4ay02710h1.pdf [file c4ay02710h1.pdf]

## Electronic Supplementary Information

# **A label-free electrochemical aptasensor for the detection of kanamycin in milk**

Nandi Zhou,\* Jibao Luo, Juan Zhang, Yuanding You, Yaping Tian

The Key Laboratory of Industrial Biotechnology, Ministry of Education, School of Biotechnology, Jiangnan University, Wuxi 214122, China

\*Corresponding author. Tel: +86-510-85197831; Fax: +86-510-85197831; E-mail:

[zhounandi@jiangnan.edu.cn](mailto:zhounandi@jiangnan.edu.cn)

## **Experimental**

The modification of the aptamer on gold surface was monitored by surface plasmon resonance (SPR) measurement. The gold disk was prepared by soaking in piranha solution (98% H<sub>2</sub>SO<sub>4</sub>:30% H<sub>2</sub>O<sub>2</sub>=3:1) for 5 min to remove all adsorbed substance. After rinsing with ultrapure water, the gold disk was fixed on an Autolab ESPRIT system (Echo Chemie B.V., Netherlands). Then the modification of kanamycin-specific aptamer was carried out by incubation with 1.0 μM aptamer. The immobilization of the aptamer was real-time monitored by SPR spectroscopy.

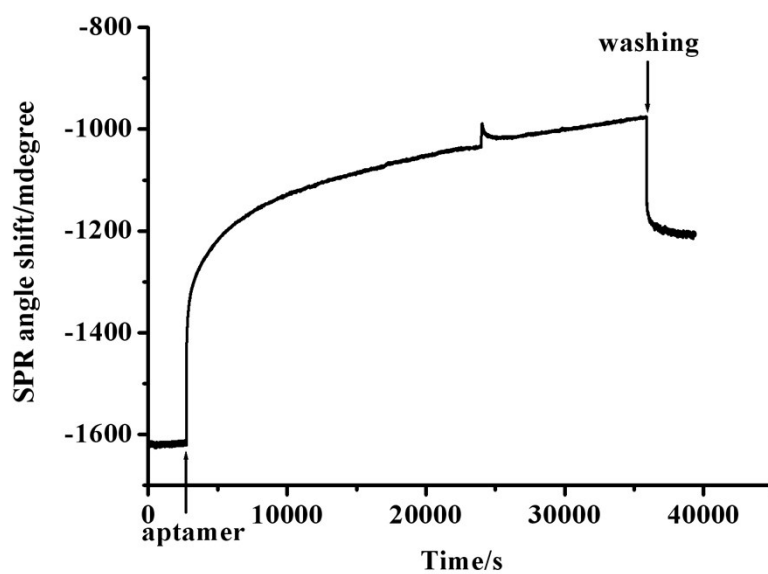

**Fig. S1.** SPR angle shift during the modification of the aptamer .

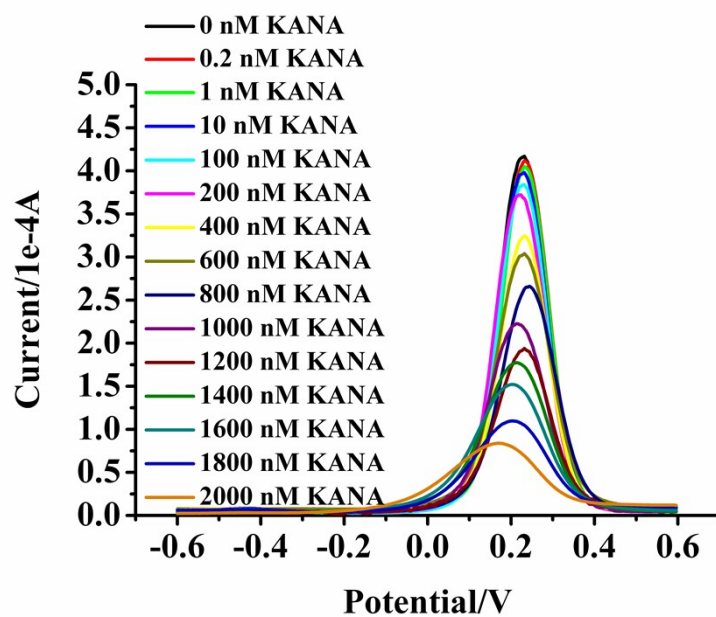

**Fig. S2.** Square wave voltammograms obtained in 10 mM  $[\text{Fe}(\text{CN})_6]^{3-/4-}$  after the aptamer functionalized electrode incubated with different concentrations of standard kanamycin solution.

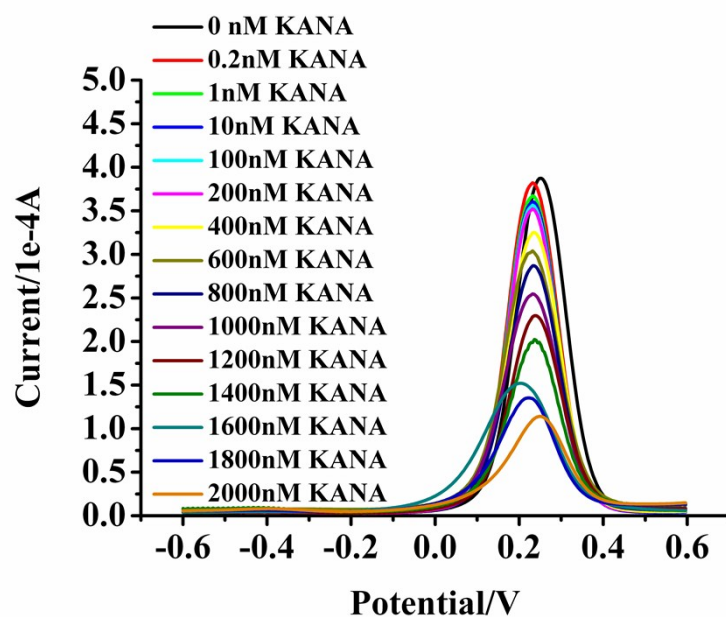

**Fig. S3.** Square wave voltammograms obtained in 10 mM  $[\text{Fe}(\text{CN})_6]^{3-/4-}$  after aptamer functionalized electrode incubated with diluted milk samples containing different concentrations of kanamycin.
